# Supplementary material for: Prevalence And Genetic Diversity of Bartonella Spp. In Northern Bats (Eptesicus Nilssonii) And Their Blood-Sucking Ectoparasites In Hokkaido, Japan
Source: Research Square preprint supplement (doi:10.21203/rs.3.rs-670515/v1), 2021-07-16
Supplement: Supplementary file 1 [file 15e1e8b5f87f521745e78b1d.xlsx]

## Sheet: Sheet1
Accession No. of gltA	Origin		Country	Name of Bartonella strain	Reference
	Host type	Scientific name
KP100356	Bat	Hipposideros armiger	Vietnam	B095	Anh et al., 2015
KP100357	Bat	Hipposideros armiger	Vietnam	B096	Anh et al., 2015
KP100354	Bat	Hipposideros larvatus	Vietnam	B081	Anh et al., 2015
KP100355	Bat	Hipposideros larvatus	Vietnam	B087	Anh et al., 2015
KP100360	Bat	Hipposideros larvatus	Vietnam	B110	Anh et al., 2015
KP100359	Bat	Megaderma lyra	Vietnam	B109	Anh et al., 2015
KP100341	Bat	Megaderma spasma	Vietnam	B005	Anh et al., 2015
KP100352	Bat	Megaerops niphanae	Vietnam	B072	Anh et al., 2015
KP100340	Bat	Rhinolophus acuminatus	Vietnam	B003	Anh et al., 2015
KP100342	Bat	Rhinolophus acuminatus	Vietnam	B006	Anh et al., 2015
KP100345	Bat	Rhinolophus acuminatus	Vietnam	B050	Anh et al., 2015
KP100346	Bat	Rhinolophus acuminatus	Vietnam	B052	Anh et al., 2015
KP100347	Bat	Rhinolophus acuminatus	Vietnam	B055	Anh et al., 2015
KP100348	Bat	Rhinolophus acuminatus	Vietnam	B056	Anh et al., 2015
KP100349	Bat	Rhinolophus acuminatus	Vietnam	B063	Anh et al., 2015
KP100350	Bat	Rhinolophus acuminatus	Vietnam	B064	Anh et al., 2015
KP100351	Bat	Rhinolophus acuminatus	Vietnam	B068	Anh et al., 2015
KP100353	Bat	Rhinolophus borneensis	Vietnam	B079	Anh et al., 2015
KP100358	Bat	Rhinolophus borneensis	Vietnam	B102	Anh et al., 2015
KP100343	Bat	Rhinolophus sinicus	Vietnam	B047	Anh et al., 2015
KP100344	Bat	Rhinolophus sinicus	Vietnam	B049	Anh et al., 2015
HM597197	Bat	Artibeus toltecus	Guatemala	B29111	Bai et al., 2011
HM597199	Bat	Carollia perspicillata	Guatemala	B29126	Bai et al., 2011
HM597187	Bat	Desmodus rotundus	Guatemala	B29042	Bai et al., 2011
HM597188	Bat	Desmodus rotundus	Guatemala	B29043	Bai et al., 2011
HM597189	Bat	Desmodus rotundus	Guatemala	B29044	Bai et al., 2011
HM597190	Bat	Desmodus rotundus	Guatemala	B29107	Bai et al., 2011
HM597192	Bat	Desmodus rotundus	Guatemala	B29114	Bai et al., 2011
HM597195	Bat	Desmodus rotundus	Guatemala	B29119	Bai et al., 2011
HM597196	Bat	Desmodus rotundus	Guatemala	B29122	Bai et al., 2011
HM597202	Bat	Glossophaga soricina	Guatemala	B29110	Bai et al., 2011
HM597207	Bat	Micronycteris microtis	Guatemala	B29172	Bai et al., 2011
HM597198	Bat	Phyllostomus discolor	Guatemala	B29116	Bai et al., 2011
HM597200	Bat	Phyllostomus discolor	Guatemala	B29230	Bai et al., 2011
HM597201	Bat	Phyllostomus discolor	Guatemala	B29115	Bai et al., 2011
HM597204	Bat	Phyllostomus discolor	Guatemala	B29112	Bai et al., 2011
HM597193	Bat	Pteronotus davyi	Guatemala	B29102	Bai et al., 2011
HM597194	Bat	Pteronotus davyi	Guatemala	B29109	Bai et al., 2011
HM597203	Bat	Pteronotus davyi	Guatemala	B29105	Bai et al., 2011
HM597205	Bat	Pteronotus davyi	Guatemala	B29134	Bai et al., 2011
HM597206	Bat	Sturnira lilium	Guatemala	B29137	Bai et al., 2011
JQ071380	Bat	Artibeus obscurus	Peru	B32851	Bai et al., 2012
JQ071381	Bat	Artibeus planirostris	Peru	B32953	Bai et al., 2012
JQ071382	Bat	Artibeus planirostris	Peru	B32954	Bai et al., 2012
JQ071384	Bat	Carollia perspicillata	Peru	B32943	Bai et al., 2012
JQ071385	Bat	Carollia perspicillata	Peru	B32955	Bai et al., 2012
JQ071386	Bat	Carollia perspicillata	Peru	B32960	Bai et al., 2012
JQ071378	Bat	Desmodus rotundus	Peru	B32855	Bai et al., 2012
JQ071379	Bat	Desmodus rotundus	Peru	B32945	Bai et al., 2012
JQ071383	Bat	Glossophaga soricina	Peru	B32946	Bai et al., 2012
JQ071390	Bat	Myotis sp.	Peru	B32942	Bai et al., 2012
JQ071387	Bat	Phyllostomus discolor	Peru	B32947	Bai et al., 2012
JQ071388	Bat	Phyllostomus hastatus	Peru	B32854	Bai et al., 2012
JQ071389	Bat	Vampyressa bidens	Peru	B32856	Bai et al., 2012
KM030503	Bat	Eidolon helvum	Kenya	B23797	Bai et al., 2015
KM030504	Bat	Eidolon helvum	Kenya	B23812	Bai et al., 2015
KM030511	Bat	Eidolon helvum	Kenya	B24225	Bai et al., 2015
KM030514	Bat	Eidolon helvum	Kenya	B39286	Bai et al., 2015
KM030516	Bat	Eidolon helvum	Kenya	B39301	Bai et al., 2015
KM030518	Bat	Eidolon helvum	Kenya	B40005	Bai et al., 2015
KM030519	Bat	Eidolon helvum	Kenya	B40006	Bai et al., 2015
KM030522	Bat	Eidolon helvum	Kenya	B40396	Bai et al., 2015
KM030523	Bat	Eidolon helvum	Kenya	B40400	Bai et al., 2015
KM030526	Bat	Eidolon helvum	Kenya	B40908	Bai et al., 2015
MH151067	Bat fly	Eucampsipoda africana	Nigeria	NG13-015	Bai et al., 2018
MH151072	Bat fly	Eucampsipoda africana	Nigeria	NG13-033	Bai et al., 2018
MH151073	Bat fly	Eucampsipoda africana	Nigeria	NG13-010-1	Bai et al., 2018
MH151078	Bat fly	Eucampsipoda africana	Nigeria	NG13-090-1	Bai et al., 2018
MH069693	Bat	Rousettus aegyptiacus	Nigeria	B32114	Bai et al., 2018
MH069694	Bat	Rousettus aegyptiacus	Nigeria	B32123	Bai et al., 2018
MH069695	Bat	Rousettus aegyptiacus	Nigeria	B32137	Bai et al., 2018
MG799397	Bat	Desmodus rotundus	Peru	D207 AM1	Becker et al., 2018
MG799400	Bat	Desmodus rotundus	Peru	D91 CA1	Becker et al., 2018
MG799401	Bat	Desmodus rotundus	Peru	D71 LR3	Becker et al., 2018
MG799402	Bat	Desmodus rotundus	Peru	D65 AM1	Becker et al., 2018
MG799403	Bat	Desmodus rotundus	Peru	D79 LR1	Becker et al., 2018
MG799405	Bat	Desmodus rotundus	Belize	D182 OW1	Becker et al., 2018
MG799415	Bat	Desmodus rotundus	Peru	D231 CA1	Becker et al., 2018
MG799418	Bat	Desmodus rotundus	Peru	D59 LR2	Becker et al., 2018
MG799422	Bat	Desmodus rotundus	Belize	D137 OW1	Becker et al., 2018
MG799428	Bat	Desmodus rotundus	Belize	D152 OW2	Becker et al., 2018
MH790962	Bat	Desmodus rotundus	Peru	D92-CA1	Becker et al., 2018
MH790965	Bat	Desmodus rotundus	Peru	D234-AM1	Becker et al., 2018
MG878887	Bat	Glossophaga soricina	Brazil	AS9405	Becker et al., 2018
KP010151	Bat fly	Cyclopodia dubia	Madagascar	KEL02-2	Brook et al., 2015
KP010152	Bat fly	Cyclopodia dubia	Madagascar	KEL02-3	Brook et al., 2015
KP010153	Bat fly	Cyclopodia dubia	Madagascar	KEL02-4	Brook et al., 2015
KP010154	Bat fly	Cyclopodia dubia	Madagascar	KEL02-5	Brook et al., 2015
KP010155	Bat fly	Cyclopodia dubia	Madagascar	KEL04-1	Brook et al., 2015
KP010156	Bat fly	Cyclopodia dubia	Madagascar	KEL04-2	Brook et al., 2015
KP010158	Bat fly	Cyclopodia dubia	Madagascar	KEL07-1	Brook et al., 2015
KP010159	Bat fly	Cyclopodia dubia	Madagascar	KEL09-1	Brook et al., 2015
KP010162	Bat fly	Cyclopodia dubia	Madagascar	KEL17-1	Brook et al., 2015
KP010163	Bat fly	Cyclopodia dubia	Madagascar	KEL17-2	Brook et al., 2015
KP010164	Bat fly	Cyclopodia dubia	Madagascar	KEL19-1	Brook et al., 2015
KP010192	Bat fly	Cyclopodia dubia	Madagascar	KEL16	Brook et al., 2015
KP010150	Bat fly	Cyclopodia sp.	Madagascar	ANGB03-1	Brook et al., 2015
KP010191	Bat	Eidolon dupreanum	Madagascar	KEL08	Brook et al., 2015
KP010193	Bat	Eidolon dupreanum	Madagascar	KEL17	Brook et al., 2015
AJ871613	Bat	Myotis daubentonii	UK	M406	Concannon et al., 2005
AJ871612	Bat	Myotis mystacinus	UK	M62	Concannon et al., 2005
AJ871615	Bat	Nyctalus noctula	UK	M451	Concannon et al., 2005
AJ871611	Bat	Pipistrellus sp.	UK	M409	Concannon et al., 2005
AJ871614	Bat	Pipistrellus sp.	UK	M207	Concannon et al., 2005
MG914433	Bat	Myotis alcathoe	Romania	B3	Corduneanu et al., 2018
MG914432	Bat	Nyctalus noctula	Romania	B2	Corduneanu et al., 2018
KP715473	Bat	Noctilio albiventris	French Guiana	C65	Davoust et al., 2015
KP715477	Bat	Pteronotus parnellii	French Guiana	C102	Davoust et al., 2015
MN250734	Bat	Eidolon helvum	Ghana	Eh6-0310-A188	Direct submission
MN250735	Bat	Eidolon helvum	Ghana	Eh6-0311-A083	Direct submission
MN250736	Bat	Eidolon helvum	Ghana	Eh6-0311-A192	Direct submission
MN250738	Bat	Eidolon helvum	Ghana	Eh6-0510-A106	Direct submission
MN250741	Bat	Eidolon helvum	Ghana	Eh6-0510-A166	Direct submission
MN250744	Bat	Eidolon helvum	Ghana	Eh6-0710-A155	Direct submission
MN250755	Bat	Eidolon helvum	Ghana	Eh6-1109-Q131	Direct submission
MN250762	Bat	Eidolon helvum	Ghana	Eh6-170112-D074	Direct submission
MG551538	Bat fly	Strebla guajiro	Brazil	956A	do Amaral et al., 2018
MG654770	Bat fly	Strebla guajiro	Brazil	2	do Amaral et al., 2018
MH204897	Bat	Artibeus obscurus	Brazil	RM 529	Ferreira et al., 2018
MH204887	Bat	Carollia perspicillata	Brazil	EM 185	Ferreira et al., 2018
MH204888	Bat	Carollia perspicillata	Brazil	EM 199	Ferreira et al., 2018
MH204893	Bat	Desmodus rotundus	Brazil	RM 564	Ferreira et al., 2018
MH204889	Bat	Phyllostomus discolor	Brazil	EM 209	Ferreira et al., 2018
MH204890	Bat	Sturnira lilium	Brazil	EM 805	Ferreira et al., 2018
MH204894	Bat	Sturnira lilium	Brazil	EM 819	Ferreira et al., 2018
MH204896	Bat	Sturnira lilium	Brazil	RM 525	Ferreira et al., 2018
MH234328	Bat	Artibeus glaucus watsoni	Costa Rica	ARTWAT_HF12.3_HM2.3	Frank et al., 2018
MH234329	Bat	Artibeus glaucus watsoni	Costa Rica	ARTWAT_HF19.1_104.1	Frank et al., 2018
MH234330	Bat	Artibeus glaucus watsoni	Costa Rica	ARTWAT_HF21.2_108.2	Frank et al., 2018
MH234334	Bat	Artibeus glaucus watsoni	Costa Rica	ARTWAT_HF34.4_120.4	Frank et al., 2018
MH234317	Bat	Artibeus lituratus	Costa Rica	ARTLIT_HF12.9_92.26	Frank et al., 2018
MH234318	Bat	Artibeus lituratus	Costa Rica	ARTLIT_HF22.5_109.5	Frank et al., 2018
MH234319	Bat	Artibeus lituratus	Costa Rica	ARTLIT_HF23.5_110.5	Frank et al., 2018
MH234327	Bat	Artibeus lituratus	Costa Rica	ARTLIT_HM1.2_HM2.20	Frank et al., 2018
MH234337	Bat	Carollia castanea	Costa Rica	CARCAS_SJ8.5_126.5	Frank et al., 2018
MH234342	Bat	Carollia perspicillata	Costa Rica	CARPER_HF11.9_93.11	Frank et al., 2018
MH234349	Bat	Carollia perspicillata	Costa Rica	CARPER_HF36.3_124.3	Frank et al., 2018
MH234350	Bat	Carollia perspicillata	Costa Rica	CARPER_HF38.3_128.3	Frank et al., 2018
MH234351	Bat	Carollia perspicillata	Costa Rica	CARPER_HF39.3_129.3	Frank et al., 2018
MH234358	Bat fly	Exastinion clovisi	Costa Rica	HYLUND_fly_HF17.3_99.3	Frank et al., 2018
MH234354	Bat	Glossophaga soricina	Costa Rica	GLOSOR_HF38.10_128.10	Frank et al., 2018
MH234356	Bat	Glossophaga soricina	Costa Rica	GLOSOR_HF16.1_94.1	Frank et al., 2018
MH234380	Bat	Glossophaga soricina	Costa Rica	GLOSOR_HF10.4_102.4	Frank et al., 2018
MH234339	Bat	Megistopoda proxim	Costa Rica	CARPER_fly_HF20.6_107.6	Frank et al., 2018
MH234363	Bat	Megistopoda proxima	Costa Rica	STULIL_fly_HM1.3_HM2.21	Frank et al., 2018
MH234365	Bat	Megistopoda proxima	Costa Rica	STULIL_fly_HM2.4_101.4	Frank et al., 2018
MH234361	Bat	Myotis keaysi	Costa Rica	MYOKEA_SJ7.5_135.3	Frank et al., 2018
MH234362	Bat	Myotis keaysi	Costa Rica	MYOKEA_SJ8.16_134.5	Frank et al., 2018
MH234316	Bat fly	Paratrichobius longicrus	Costa Rica	ARTLIT_fly_HM2.5_101.5	Frank et al., 2018
MH234338	Bat fly	Speiseria ambigua	Costa Rica	CARPER_fly_HF18.3_100.3	Frank et al., 2018
MH234359	Bat fly	Strebla spp.	Costa Rica	HYLUND_FLY_SJ12.7_134.8	Frank et al., 2018
MH234369	Bat	Sturnira parvidens	Costa Rica	STULIL_HF19.3_104.3	Frank et al., 2018
MH234374	Bat	Sturnira parvidens	Costa Rica	STULIL_HF33.5_121.5	Frank et al., 2018
MH234379	Bat	Sturnira parvidens	Costa Rica	STULIL_HF11.5_79.3	Frank et al., 2018
MH234340	Bat fly	Trichobius joblingi	Costa Rica	CARPER_fly_HM2.2_101.2	Frank et al., 2018
MH234360	Bat fly	Trichobius lonchophyllae	Costa Rica	LONROB_TLON_HF18.2_100.2	Frank et al., 2018
KX655808	Bat	Myotis fimbriatus	China	SD-74-22015	Han et al., 2017
KX655813	Bat	Myotis fimbriatus	China	SD-642015	Han et al., 2017
KX655821	Bat	Myotis fimbriatus	China	SD-732015	Han et al., 2017
KX655822	Bat	Myotis fimbriatus	China	SD-752015	Han et al., 2017
KX655827	Bat	Myotis fimbriatus	China	SD-74-1/2015	Han et al., 2017
KX655829	Bat	Myotis fimbriatus	China	SD-702015	Han et al., 2017
KX655832	Bat	Myotis fimbriatus	China	SD-622015	Han et al., 2017
KX655834	Bat	Myotis fimbriatus	China	SD-722015	Han et al., 2017
KX655839	Bat	Myotis fimbriatus	China	SD-78/2015	Han et al., 2017
KX655843	Bat	Myotis fimbriatus	China	SD-76/2015	Han et al., 2017
KX655811	Bat	Myotis pequinius	China	SD-832015	Han et al., 2017
KX655814	Bat	Myotis pequinius	China	SD-120-1/2015	Han et al., 2017
KX655815	Bat	Myotis pequinius	China	SD-1232015	Han et al., 2017
KX655816	Bat	Myotis pequinius	China	SD-120-22015	Han et al., 2017
KX655819	Bat	Myotis pequinius	China	SD-1242015	Han et al., 2017
KX655820	Bat	Myotis pequinius	China	SD-122/2015	Han et al., 2017
KX655823	Bat	Myotis pequinius	China	SD-99/2015	Han et al., 2017
KX655825	Bat	Myotis pequinius	China	SD-1192015	Han et al., 2017
KX655828	Bat	Myotis pequinius	China	SD-932015	Han et al., 2017
KX655830	Bat	Myotis pequinius	China	SD-142/2015	Han et al., 2017
KX655833	Bat	Myotis pequinius	China	SD-962015	Han et al., 2017
KX655835	Bat	Myotis pequinius	China	SD-1172015	Han et al., 2017
KX655836	Bat	Myotis pequinius	China	SD-1382015	Han et al., 2017
KX655841	Bat	Myotis pequinius	China	SD-1112015	Han et al., 2017
KX655842	Bat	Myotis pequinius	China	SD-109/2015	Han et al., 2017
KX655812	Bat	Myotis ricketii	China	SD-912015	Han et al., 2017
KX655838	Bat	Rhinolophus ferrumequinum	China	SD-32015	Han et al., 2017
KX655818	Bat	Rhinolophus pusillus	China	SD-162015	Han et al., 2017
KX655824	Bat	Rhinolophus pusillus	China	SD-192015	Han et al., 2017
KY356753	Bat	bat	Brazil	1	Ikeda et al., 2017
KY356754	Bat	bat	Brazil	2	Ikeda et al., 2017
KJ816666	Bat	Anoura geoffroy	Costa rica	SJ101	Judson et al., 2015
KJ816688	Bat	Anoura geoffroyi	Costa rica	SJ102	Judson et al., 2015
KJ816682	Bat	Artibeus jamaicensis	Costa rica	SJ109	Judson et al., 2015
KJ816675	Bat	Artibeus lituratus	Costa rica	SJ106	Judson et al., 2015
KJ816680	Bat	Artibeus lituratus	Costa rica	SJ103	Judson et al., 2015
KJ816685	Bat	Artibeus lituratus	Costa rica	SJ111	Judson et al., 2015
KJ816683	Bat	Carollia castanea	Costa rica	SJ105	Judson et al., 2015
KJ816686	Bat	Carollia castanea	Costa rica	SJ116	Judson et al., 2015
KJ816690	Bat	Carollia sowelli	Costa rica	SJ114	Judson et al., 2015
KJ816668	Bat	Costa Rican bats	Costa rica	SJ115	Judson et al., 2015
KJ816671	Bat	Costa Rican bats	Costa rica	SJ121	Judson et al., 2015
KJ816674	Bat	Costa Rican bats	Costa rica	SJ130	Judson et al., 2015
KJ816687	Bat	Costa Rican bats	Costa rica	SJ112	Judson et al., 2015
KJ816691	Bat	Costa Rican bats	Costa rica	SJ117	Judson et al., 2015
KJ816678	Bat	Glossophaga soricina	Costa rica	SJ108	Judson et al., 2015
KJ816681	Bat	Micronycteris microtus	Costa rica	SJ119	Judson et al., 2015
KJ816669	Bat	Myotis keaysi	Costa rica	SJ125	Judson et al., 2015
KJ816676	Bat	Myotis keaysi	Costa rica	SJ124	Judson et al., 2015
KJ816689	Bat	Myotis keaysi	Costa rica	SJ132	Judson et al., 2015
KJ816665	Bat	Phyllostomus discolor	Costa rica	SJ118	Judson et al., 2015
KJ816684	Bat	Platyrrhinus vittatus	Costa rica	SJ107	Judson et al., 2015
KJ816670	Bat	Sturnira lilium	Costa rica	SJ131	Judson et al., 2015
KJ816673	Bat	Sturnira lilium	Costa rica	SJ122	Judson et al., 2015
KJ816679	Bat	Sturnira lilium	Costa rica	SJ127	Judson et al., 2015
KJ816677	Bat	Uroderma bilobatum	Costa rica	SJ129	Judson et al., 2015
KJ816692	Bat	Uroderma bilobatum	Costa rica	SJ128	Judson et al., 2015
KJ816672	Bat	Vampyressa thyone	Costa rica	SJ104	Judson et al., 2015
HM545136	Bat	Coleura afra	Kenya	C-583	Kosoy et al., 2010
HM363765	Bat	Eidolon helvum	Kenya	E1-105	Kosoy et al., 2010
HM363766	Bat	Eidolon helvum	Kenya	E2-114	Kosoy et al., 2010
HM363767	Bat	Eidolon helvum	Kenya	E3-106	Kosoy et al., 2010
HM363768	Bat	Eidolon helvum	Kenya	Ew-111	Kosoy et al., 2010
HM545137	Bat	Hipposideros sp.	Kenya	H-556	Kosoy et al., 2010
HM545139	Bat	Miniopterus sp.	Kenya	M1-44	Kosoy et al., 2010
HM545140	Bat	Miniopterus sp.	Kenya	M2-491	Kosoy et al., 2010
HM545141	Bat	Miniopterus sp.	Kenya	M3-373	Kosoy et al., 2010
HM363764	Bat	Rousettus aegyptiacus	Kenya	R-191	Kosoy et al., 2010
HM545138	Bat	Triaenops persicus	Kenya	T-837	Kosoy et al., 2010
KR822802	Bat	Myotis daubentonii	Finland	bat2053_2034	Liley et al., 2015
KX807181	Other ectoparasites	Cimex adjunctus	Canada	bug_23	Lilley et al., 2017
KX807178	Bat	Myortis grisescens	USA	DMR02005	Lilley et al., 2017
KX807171	Bat	Myotis lucifugus	USA	DMR02097	Lilley et al., 2017
KX807172	Bat	Myotis lucifugus	USA	DMR02050	Lilley et al., 2017
KX807177	Bat	Myotis lucifugus	USA	DMR02051	Lilley et al., 2017
JF500507	Bat	Miniopterus schreibersii	Taiwan	No.01	Lin et al., 2012
JF500508	Bat	Miniopterus schreibersii	Taiwan	No.02	Lin et al., 2012
JF500509	Bat	Miniopterus schreibersii	Taiwan	No.03	Lin et al., 2012
JF500511	Bat	Miniopterus schreibersii	Taiwan	No.05	Lin et al., 2012
JF500513	Bat	Miniopterus schreibersii	Taiwan	No.07	Lin et al., 2012
JF500515	Bat	Miniopterus schreibersii	Taiwan	No.09	Lin et al., 2012
KY232196	Bat	Chaerephon plicatus	Thailand	SK128	McKee et al., 2017
KY232200	Bat	Chaerephon plicatus	Thailand	SK163	McKee et al., 2017
KY232204	Bat	Chaerephon plicatus	Thailand	SK170	McKee et al., 2017
KY232208	Bat	Chaerephon plicatus	Thailand	SK194	McKee et al., 2017
KY232212	Bat	Hipposideros armiger	Thailand	KK182	McKee et al., 2017
KY232222	Bat	Hipposideros fulvus	Thailand	CR224	McKee et al., 2017
KY232195	Bat	Hipposideros larvatus	Thailand	KP293b	McKee et al., 2017
KY232217	Bat	Hipposideros larvatus	Thailand	KP270	McKee et al., 2017
KY232218	Bat	Hipposideros larvatus	Thailand	KP277	McKee et al., 2017
KY232221	Bat	Hipposideros larvatus	Thailand	KP292	McKee et al., 2017
KY232194	Bat	Taphozous melanopogon	Thailand	KP283b	McKee et al., 2017
KY888210	Other ectoparasites	Cimex adjunctus	USA	155293	Mckee et al., 2018
MK140307	Bat fly	Basilia nana	Belgium	57BF179	McKee et al., 2019
MK140306	Bat fly	Basilia nattereri	Hungary	KDS9	McKee et al., 2019
MK140276	Bat fly	Nycteribia kolenatii	Romania	3gCJ202997	McKee et al., 2019
MK140189	Bat fly	Nycteribia kolenatii	Belgium	28BF162	McKee et al., 2019
MK140265	Bat fly	Nycteribia kolenatii	Belgium	27BF161	McKee et al., 2019
MK140275	Bat fly	Nycteribia kolenatii	Romania	52dCJ894156	McKee et al., 2019
MK140296	Bat fly	Nycteribia kolenatii	Romania	52aCJ864156	McKee et al., 2019
MK140298	Bat fly	Nycteribia kolenatii	Romania	52bCJ874156	McKee et al., 2019
MK140299	Bat fly	Nycteribia kolenatii	Belgium	31BF164	McKee et al., 2019
MK140310	Bat fly	Nycteribia kolenatii	Hungary	GTHU85	McKee et al., 2019
MK140318	Bat fly	Nycteribia kolenatii	Netherlands	2BF78	McKee et al., 2019
MK140322	Bat fly	Nycteribia kolenatii	Belgium	25BF161	McKee et al., 2019
MK140216	Bat fly	Penicillidia conspicua	Romania	110CJ1874312	McKee et al., 2019
MK140261	Bat fly	Penicillidia conspicua	Romania	15bCJ363606	McKee et al., 2019
MK140327	Bat fly	Penicillidia conspicua	Romania	15aCJ353606	McKee et al., 2019
MK140218	Other ectoparasites	Argas vespertilionis	Netherlands	198T155	McKee et al., 2019
MK140224	Other ectoparasites	Argas vespertilionis	Netherlands	56T67	McKee et al., 2019
MK140232	Other ectoparasites	Argas vespertilionis	Netherlands	72T68	McKee et al., 2019
MK140210	Other ectoparasites	Cimex pipistrelli	Netherlands	32BB	McKee et al., 2019
MK140211	Other ectoparasites	Cimex pipistrelli	Netherlands	281BB	McKee et al., 2019
MK140225	Other ectoparasites	Cimex pipistrelli	Netherlands	13SBB	McKee et al., 2019
MK140227	Other ectoparasites	Cimex pipistrelli	Netherlands	111BB	McKee et al., 2019
MK140233	Other ectoparasites	Cimex pipistrelli	Netherlands	174BB	McKee et al., 2019
MK140239	Other ectoparasites	Cimex pipistrelli	Netherlands	26BB	McKee et al., 2019
MK140244	Other ectoparasites	Cimex pipistrelli	Netherlands	17SBB	McKee et al., 2019
MK140245	Other ectoparasites	Cimex pipistrelli	Netherlands	191BB	McKee et al., 2019
MK140219	Bat flea	Ischnopsyllus variabilis	Netherlands	10F94	McKee et al., 2019
MK140241	Bat flea	Ischnopsyllus variabilis	Netherlands	1F40	McKee et al., 2019
MK140207	Other ectoparasites	Ixodes ariadnae	Belgium	241TI214	McKee et al., 2019
MK140204	Other ectoparasites	Macronyssidae sp.	Netherlands	155M83	McKee et al., 2019
MK140234	Other ectoparasites	Macronyssidae sp.	Netherlands	210M147	McKee et al., 2019
MK140184	Bat	Myotis dasycneme	Netherlands	264BB	McKee et al., 2019
MK140292	Bat fly	Phthiridium biarticulatum	Romania	12CJ313594	McKee et al., 2019
MK140293	Bat fly	Phthiridium biarticulatum	Romania	79aCJ1374223	McKee et al., 2019
MK140295	Bat fly	Phthiridium biarticulatum	Romania	30CJ523644	McKee et al., 2019
MK140312	Bat fly	Phthiridium biarticulatum	Romania	83cCJ1484227	McKee et al., 2019
MK140314	Bat fly	Phthiridium biarticulatum	Romania	86CJ1514279	McKee et al., 2019
MK140332	Bat fly	Phthiridium biarticulatum	Romania	8CJ263583	McKee et al., 2019
MK140193	Other ectoparasites	Spinturnix andegavinus	Belgium	106S194	McKee et al., 2019
MK140208	Other ectoparasites	Spinturnix andegavinus	Belgium	69S177	McKee et al., 2019
MK140186	Other ectoparasites	Spinturnix kolenatii	Netherlands	26S83	McKee et al., 2019
MK140240	Other ectoparasites	Spinturnix kolenatii	Netherlands	31S86	McKee et al., 2019
MN529473	Bat	Artibeus jamaicensis	Guatemala	B41211	Mckee et al., 2020
MN529483	Bat	Artibeus lituratus	Guatemala	B40899	Mckee et al., 2020
MN529491	Bat	Artibeus lituratus	Guatemala	B43902	Mckee et al., 2020
MN529474	Bat	Carollia sowelli	Guatemala	B41090	Mckee et al., 2020
MN529476	Bat	Carollia sowelli	Guatemala	B41091	Mckee et al., 2020
MN529470	Bat	Desmodus rotundus	Guatemala	B41407	Mckee et al., 2020
MN529498	Bat	Desmodus rotundus	Guatemala	B41525	Mckee et al., 2020
MN529500	Bat	Desmodus rotundus	Guatemala	B41527	Mckee et al., 2020
MN529493	Bat	Diphylla ecaudata	Guatemala	B43871	Mckee et al., 2020
MN529472	Bat	Glossophaga soricina	Guatemala	B41212	Mckee et al., 2020
MN529467	Bat	Hipposideros sp.	Nigeria	H-Nig-956 B42984	Mckee et al., 2020
MN529487	Bat	Lonchorhina aurita	Guatemala	B40825	Mckee et al., 2020
MN529488	Bat	Lonchorhina aurita	Guatemala	B40880	Mckee et al., 2020
MN529507	Bat	Macrophyllum macrophyllum	Guatemala	B32728	Mckee et al., 2020
MN529494	Bat	Mimon cozumelae	Guatemala	B43905	Mckee et al., 2020
MN529495	Bat	Mimon cozumelae	Guatemala	B43874	Mckee et al., 2020
MN529480	Bat	Myotis nigricans	Guatemala	B40898	Mckee et al., 2020
MN529509	Bat	Myotis nigricans	Guatemala	B32626	Mckee et al., 2020
MN529510	Bat	Myotis nigricans	Guatemala	B32625	Mckee et al., 2020
MN529511	Bat	Platyrrhinus helleri	Guatemala	B32682	Mckee et al., 2020
MN529475	Bat	Pteronotus parnellii	Guatemala	B40897	Mckee et al., 2020
MN529496	Bat	Pteronotus parnellii	Guatemala	B43869	Mckee et al., 2020
MN529477	Bat	Sturnira lilium	Guatemala	B41045	Mckee et al., 2020
MN529478	Bat	Sturnira lilium	Guatemala	B41050	Mckee et al., 2020
MN529502	Bat	Sturnira lilium	Guatemala	B32681	Mckee et al., 2020
MN529508	Bat	Trachops cirrhosus	Guatemala	B32273	Mckee et al., 2020
MN529512	Bat	Vampyressa pusilla	Guatemala	B32272	Mckee et al., 2020
JX416241	Bat fly	Basilia nattereri	Slovenia	ZAG03	Morse et al., 2012
JX416256	Bat fly	Cyclopodia horsfieldi	Malaysia	E5	Morse et al., 2012
JX416257	Bat fly	Cyclopodia horsfieldi	Malaysia	E7	Morse et al., 2012
JX416255	Bat fly	Cyclopodia simulans	Philippines	P2874	Morse et al., 2012
JX416239	Bat fly	Leptocyclopodia sp.	Philippines	JAE1033	Morse et al., 2012
JX416254	Bat fly	Paradyschiria lineata	Panama	27_3_4	Morse et al., 2012
JX416232	Bat fly	Paratrichobius longicrus	French Guiana	FG13	Morse et al., 2012
JX416238	Bat fly	Phthiridium (Stylidia) fraterna	Malaysia	MALA15	Morse et al., 2012
JX416252	Bat fly	Phthiridium sp.	Laos	05_1_07	Morse et al., 2012
JX416247	Bat fly	Pseudostrebla ribeiroi	Peru	RCO934	Morse et al., 2012
JX416251	Bat fly	Strebla diaemi	Panama	23_03_04	Morse et al., 2012
JX416233	Bat fly	Strebla mirabilis	Mexico	MEX03	Morse et al., 2012
JX416236	Bat fly	Trichobius corynorhini	USA	ZAG01	Morse et al., 2012
JX416230	Bat fly	Trichobius sp.	Puerto Rico	PU39	Morse et al., 2012
JX416237	Bat fly	Trichobius sp.	Dominican Republic	DR05241	Morse et al., 2012
JX416242	Bat fly	Trichobius sp.	Puerto Rico	FE61	Morse et al., 2012
JX416245	Bat fly	Trichobius sp.	Puerto Rico	FE34	Morse et al., 2012
JX416249	Bat fly	Trichobius sp.	Dominican Republic	DR05259	Morse et al., 2012
JX416250	Bat fly	Trichobius sp.	Dominican Republic	DR05233	Morse et al., 2012
JX416253	Bat fly	Trichobius sp.	Dominican Republic	DR0583	Morse et al., 2012
MF467757	Bat	Desmodus rotundus	Mexico	AM20_8	Moskaluk et al., 2018
LC483822	Bat	Miniopterus fuliginosus	Japan	bat23-1	Nabeshima et al., 2020
LC483823	Bat	Miniopterus fuliginosus	Japan	bat24-1	Nabeshima et al., 2020
LC522028	Bat fly	Nycteribia allotopa	Japan	Mf12NA	Nabeshima et al., 2020
LC522027	Bat fly	Nycteribia sp.	Japan	Mf9NS	Nabeshima et al., 2020
LC522029	Bat fly	Nycteribia sp.	Japan	Mf37NS3	Nabeshima et al., 2020
LC522030	Bat fly	Penicillidia jenynsii	Japan	Mf16PJ1	Nabeshima et al., 2020
LC522031	Bat fly	Penicillidia jenynsii	Japan	Mf26PJ3	Nabeshima et al., 2020
KJ530741	Bat	Artibeus jamaicensis	Puerto Rico	Aj37081	Olival et al., 2015
KJ530742	Bat	Brachyphylla cavernarum	Puerto Rico	Bc37076	Olival et al., 2015
KJ530743	Bat	Monophyllus redmani	Puerto Rico	Mr37075	Olival et al., 2015
KJ530744	Bat	Monophyllus redmani	Puerto Rico	Mr37077	Olival et al., 2015
KJ530745	Bat	Monophyllus redmani	Puerto Rico	Mr37078	Olival et al., 2015
LC461052	Bat fly	Eucampsipoda africana,	Zambia	batfly4	Qiu et al., 2020
LC461053	Bat fly	Eucampsipoda africana,	Zambia	batfly5	Qiu et al., 2020
LC461054	Bat fly	Eucampsipoda africana,	Zambia	batfly6	Qiu et al., 2020
LC461055	Bat fly	Eucampsipoda africana,	Zambia	batfly1	Qiu et al., 2020
LC460835	Bat	Macronycteris vittatus	Zambia	ZB17-107	Qiu et al., 2020
LC460836	Bat	Macronycteris vittatus	Zambia	ZB17-109	Qiu et al., 2020
LC460837	Bat	Macronycteris vittatus	Zambia	ZB17-113	Qiu et al., 2020
LC460833	Bat	Rousettus aegyptiacus	Zambia	ZB17-79	Qiu et al., 2020
LC460834	Bat	Rousettus aegyptiacus	Zambia	ZB17-86	Qiu et al., 2020
LC460838	Bat	Rousettus aegyptiacus	Zambia	ZB17-74	Qiu et al., 2020
KY629827	Bat	Desmodus rotundus	Mexico	M16	Stuckey et al., 2017
KY629849	Bat	Desmodus rotundus	Mexico	M9	Stuckey et al., 2017
KY629851	Bat	Desmodus rotundus	Mexico	DR24	Stuckey et al., 2017
KY629857	Bat	Desmodus rotundus	Mexico	DR22	Stuckey et al., 2017
KY629864	Bat	Desmodus rotundus	Mexico	A22	Stuckey et al., 2017
KY629876	Bat	Desmodus rotundus	Mexico	DR28	Stuckey et al., 2017
KY041992	Bat	Nyctalus noctula	France	BR05	Stuckey et al., 2017
KY041987	Bat	Pipistrellus nathusii	France	NC44	Stuckey et al., 2017
KY629856	Bat	Pteronotus parnellii	Mexico	F24	Stuckey et al., 2017
KY629881	Bat	Pteronotus parnellii	Mexico	F10	Stuckey et al., 2017
KY629883	Bat	Pteronotus parnellii	Mexico	F13	Stuckey et al., 2017
KY629884	Bat	Pteronotus parnellii	Mexico	F2	Stuckey et al., 2017
KY629885	Bat	Pteronotus parnellii	Mexico	F14	Stuckey et al., 2017
KY041981	Bat	unknown bat	Spain	SP08	Stuckey et al., 2017
JQ695834	Bat	Myotis myotis	Poland	AS071	Szubert-Kruszynska et al., 2019
JQ695835	Bat	Myotis myotis	Poland	AS050	Szubert-Kruszynska et al., 2019
JQ695836	Other ectoparasites	Spinturnix myoti	Poland	AS048	Szubert-Kruszynska et al., 2019
JQ695837	Other ectoparasites	Spinturnix myoti	Poland	AS036	Szubert-Kruszynska et al., 2019
JQ695838	Other ectoparasites	Spinturnix myoti	Poland	AS033	Szubert-Kruszynska et al., 2019
JQ695839	Other ectoparasites	Spinturnix myoti	Poland	AS025	Szubert-Kruszynska et al., 2019
JQ695840	Other ectoparasites	Spinturnix myoti	Poland	AS067	Szubert-Kruszynska et al., 2019
KX300200	Bat	Eptesicus serotinus	Georgia	B44722	Urushadze et al., 2017
KX300192	Bat	Miniopterus schreibersii	Georgia	B44599	Urushadze et al., 2017
KX300195	Bat	Miniopterus schreibersii	Georgia	B44608	Urushadze et al., 2017
KX300107	Bat	Myotis blythii	Georgia	B44591	Urushadze et al., 2017
KX300112	Bat	Myotis blythii	Georgia	B44601	Urushadze et al., 2017
KX300117	Bat	Myotis blythii	Georgia	B44602	Urushadze et al., 2017
KX300123	Bat	Myotis blythii	Georgia	B44622	Urushadze et al., 2017
KX300127	Bat	Myotis blythii	Georgia	B44711	Urushadze et al., 2017
KX300140	Bat	Myotis blythii	Georgia	B44731	Urushadze et al., 2017
MK140382	Bat	Myotis blythii	Georgia	B44707	Urushadze et al., 2017
MK140386	Bat	Myotis blythii	Georgia	B44590	Urushadze et al., 2017
KX300145	Bat	Myotis emarginatus	Georgia	B44544	Urushadze et al., 2017
KX300149	Bat	Myotis emarginatus	Georgia	B44617	Urushadze et al., 2017
KX300154	Bat	Myotis emarginatus	Georgia	B44724	Urushadze et al., 2017
MK140365	Bat	Myotis emarginatus	Georgia	B44694	Urushadze et al., 2017
MK140379	Bat	Myotis emarginatus	Georgia	B44735	Urushadze et al., 2017
KX300179	Bat	Pipistrellus pygmaeus	Georgia	B44718	Urushadze et al., 2017
KX300158	Bat	Rhinolophus euryale	Georgia	B44528	Urushadze et al., 2017
KX300165	Bat	Rhinolophus ferrumequinum	Georgia	B44658	Urushadze et al., 2017
KX300169	Bat	Rhinolophus ferrumequinum	Georgia	B44706	Urushadze et al., 2017
MK140340	Bat	Rhinolophus ferrumequinum	Georgia	B44546	Urushadze et al., 2017
KF003115	Bat	Eptesicus nilssoni	Finland	1157/3	Veikkolainen et al., 2014
KF003122	Bat	Myotis daubentonii	Finland	1160/1	Veikkolainen et al., 2014
KF003129	Bat	Myotis daubentonii	Finland	B. naantaliensis 2574/1	Veikkolainen et al., 2014
KF003137	Bat flea	Siphonaptera sp.	Finland	NB-1.2	Veikkolainen et al., 2014
KT751147	Bat fly	Basilia (Paracyclopodia) sp.	Madagascar	1b_Basilia	Wilkinson et al., 2016
KT751157	Bat fly	Basilia (Paracyclopodia) sp.	Madagascar	SC1_Basilia	Wilkinson et al., 2016
KT751146	Bat fly	Cyclopodia dubia	Madagascar	1_CycDub	Wilkinson et al., 2016
KT751148	Bat fly	Cyclopodia dubia	Madagascar	4_CycDub	Wilkinson et al., 2016
KT751149	Bat fly	Cyclopodia dubia	Madagascar	5_CycDub	Wilkinson et al., 2016
KT751150	Bat fly	Cyclopodia dubia	Madagascar	6_CycDub	Wilkinson et al., 2016
KT751151	Bat fly	Cyclopodia dubia	Madagascar	7_CycDub	Wilkinson et al., 2016
KT751156	Bat fly	Eucampsipoda theodori	Madagascar	J22_EucThe	Wilkinson et al., 2016
KT751155	Bat fly	Nycteribia stylidiopsis	Madagascar	Gr6_NycSty	Wilkinson et al., 2016
KT751154	Bat fly	Penicillidia cf. fulvida	Madagascar	Gr21_PenFul	Wilkinson et al., 2016
KT751153	Bat fly	Penicillidia leptothrinax	Madagascar	Gr20_PenLep	Wilkinson et al., 2016
KT751143	Bat fly	Penicillidia leptothrinax	Madagascar	11c_PenLep	Wilkinson et al., 2016
KT751145	Bat fly	Penicillidia leptothrinax	Madagascar	13b_PenLep	Wilkinson et al., 2016
